# Supplementary material for: Versatile functionalization of 3,5-diamino-4-nitropyrazole for promising insensitive energetic compounds
Source: Royal Society of Chemistry journal article supplement (doi:10.1039/c9dt03138c), 2019-01-01
Supplement: c9dt03138c1.pdf [file c9dt03138c1.pdf]

## Electronic Supplementary Information

### **Versatile Functionalization of 3,5-Diamino-4-nitropyrazole for Promising Insensitive Energetic Compounds**

Yongxing Tang,<sup>a,b</sup> Jinchao Ma,<sup>a,b</sup> Gregory H. Imler,<sup>c</sup> Damon A. Parrish<sup>c</sup> and Jean'ne M. Shreeve<sup>\*a</sup>

[a] Dr. Y. Tang, J. Ma, Prof. Dr. J. M. Shreeve

Department of Chemistry

University of Idaho

Moscow, Idaho, 83844-2343 USA.

Fax: (+1) 208-885-9146

E-mail: [jshreeve@uidaho.edu](mailto:jshreeve@uidaho.edu)

[b] Dr. Y. Tang, J. Ma

Nanjing University of Science and Technology

Nanjing, 210094 (China)

[c] Dr. G. H. Imler, D. A. Parrish

Naval Research Laboratory

4555 Overlook Avenue

Washington, D.C. 20375 USA

## Table of contents

|                            |     |
|----------------------------|-----|
| Computational Methods      | S3  |
| Crystal Structure Analysis | S5  |
| References                 | S14 |

**Computational Methods:** The gas phase enthalpies of formation were calculated based on isodesmic reactions (Scheme S1). The enthalpy of reaction is obtained by combining the MP2/6–311++G\*\* energy difference for the reactions, the scaled zero point energies (ZPE), values of thermal correction (HT), and other thermal factors. The solid-state heats of formation were calculated based on Trouton’s rule according to equation (1) ( $T$  represents either the melting point or the decomposition temperature when no melting occurs prior to decomposition).<sup>1</sup>

$$\Delta H_{sub} = 188 / Jmol^{-1}K^{-1} \times T \quad (1)$$

For energetic salts, the solid-phase enthalpy of formation is obtained using a Born–Haber energy cycle (Scheme S2).<sup>2</sup> The solid phase heat of formation of energetic salts can be simplified by Equation (2).

$$\Delta H_f^\circ(\text{salt}, 298K) = \Delta H_f^\circ(\text{cation}, 298K) + \Delta H_f^\circ(\text{anion}, 298K) - \Delta H_L \quad (2)$$

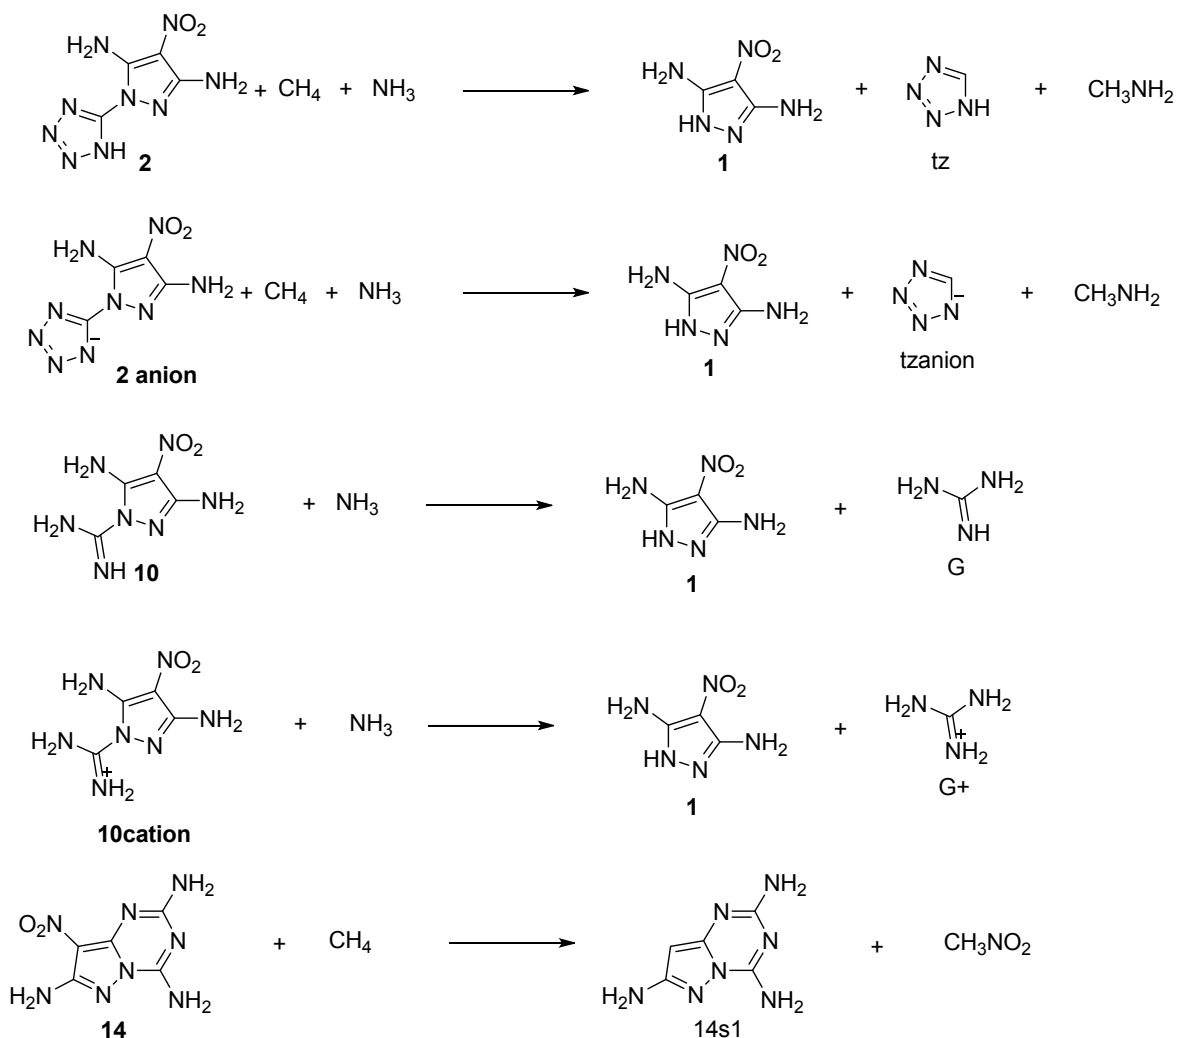

**Scheme S1.** Isodesmic reactions

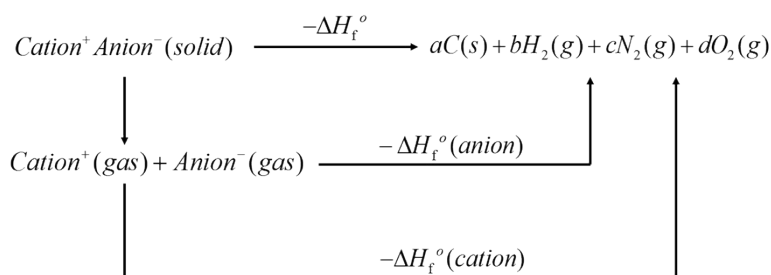

**Scheme S2** Born–Haber cycle for the formation of energetic salts.  $a$ ,  $b$ ,  $c$ ,  $d$  are the number of moles of the respective products.

In Equation (2), the lattice energy ( $\Delta H_L$ ) could be predicted by using the formula suggested by reported methods<sup>3</sup> [Equation (3)].

$$\Delta H_L = U_{POT} + [p(nM / 2 - 2) + q(n_x / 2 - 2)]RT \quad (3)$$

in which  $nM$  and  $n_x$  depend on the nature of the ions  $M^{p+}$  and  $X^{q-}$ , respectively, and are equal to three for monoatomic ions, five for linear polyatomic ions, and six for nonlinear polyatomic ions. The equation for lattice potential energy  $U_{POT}$  has the form [Equation (4)]:

$$U_{POT} [kJmol^{-1}] = \gamma(\rho / M)_{1/3} + \delta \quad (4)$$

For the compound which is a hydrate ( $7 \cdot \text{H}_2\text{O}$  and  $11 \cdot 2\text{H}_2\text{O}$ ), the solid-phase enthalpy of formation is obtained by adding the gas phase heat of formation of the anhydrous compound to that of water ( $-241.8 \text{ kJ mol}^{-1}$ ).<sup>4</sup>

**Table S1.** Calculated zero point energy (*ZPE*), values of the correction ( $H_r$ ), total energy ( $E_0$ ) and gas-state heats of formation (*HOF*)

| Species                         | ZPE      | $H_r$    | $E_0$        | corrected $E_0$ | HOF(kJ mol <sup>-1</sup> ) |
|---------------------------------|----------|----------|--------------|-----------------|----------------------------|
| 2                               | 0.134367 | 0.147753 | -796.6755811 | -796.53320      | 484.0076958                |
| 2anion                          | 0.121462 | 0.134377 | -796.1694654 | -796.03995      | 268.3671766                |
| 10                              | 0.146322 | 0.15925  | -688.6467021 | -688.49330      | 216.1391833                |
| 10cation                        | 0.159492 | 0.172676 | -689.0269266 | -688.86063      | 775.1387349                |
| 14                              | 0.146269 | 0.160562 | -780.7199983 | -780.56529      | 254.7325443                |
| 1                               | 0.107276 | 0.117201 | -540.1924739 | -540.07956      | 137.09                     |
| 14s1                            | 0.144539 | 0.155758 | -576.6165504 | -576.46657      | 270.67 <sup>[a]</sup>      |
| CH <sub>3</sub> NH <sub>2</sub> | 0.06403  | 0.06840  | -95.59384    | -95.52800       | -23 <sup>[b]</sup>         |
| tz                              | 0.046867 | 0.051296 | -257.653854  | -257.60443      | 335.14 <sup>[b]</sup>      |
| tzanion                         | 0.033829 | 0.038053 | -257.1242314 | -257.08753      | 181.58 <sup>[a]</sup>      |
| G                               | 0.075947 | 0.081442 | -204.8735052 | -204.79510      | 26 <sup>[a]</sup>          |
| G+                              | 0.088414 | 0.094658 | -205.2570327 | -205.16591      | 575.85 <sup>[a]</sup>      |
| CH <sub>3</sub> NO <sub>2</sub> | 0.04984  | 0.055138 | -244.4784821 | -244.42534      | -74.3 <sup>[b]</sup>       |
| NH <sub>3</sub>                 | 0.034384 | 0.038203 | -56.4154647  | -56.37864       | -45.9 <sup>[b]</sup>       |
| CH <sub>4</sub>                 | 0.044793 | 0.048605 | -40.3796224  | -40.33281       | -74.6 <sup>[b]</sup>       |

[a] Data obtained from G2.

[b] Data are from Ref. [D. R. Lide, ed., CRC Handbook of Chemistry and Physics, 88th Edition (Internet Version 2008), CRC Press/Taylor and Francis, Boca Raton, FL.].

## Crystal Structure Analysis

**Table S2.** Crystal data and structure refinement for **2**.

|                                   |                                                             |                              |
|-----------------------------------|-------------------------------------------------------------|------------------------------|
| Identification code               | <b>2</b>                                                    |                              |
| Empirical formula                 | C <sub>4</sub> H <sub>7</sub> N <sub>9</sub> O <sub>3</sub> |                              |
| CCDC number                       | 1861409                                                     |                              |
| Formula weight                    | 229.19                                                      |                              |
| Temperature                       | 293(2) K                                                    |                              |
| Wavelength                        | 0.71073 Å                                                   |                              |
| Crystal system                    | Monoclinic                                                  |                              |
| Space group                       | P2 <sub>1</sub> /c                                          |                              |
| Unit cell dimensions              | $a = 9.1165(4)$ Å                                           | $\alpha = 90^\circ$ .        |
|                                   | $b = 14.3444(6)$ Å                                          | $\beta = 108.033(2)^\circ$ . |
|                                   | $c = 7.2327(3)$ Å                                           | $\gamma = 90^\circ$ .        |
| Volume                            | 899.36(7) Å <sup>3</sup>                                    |                              |
| Z                                 | 4                                                           |                              |
| Density (20°C)                    | 1.693 Mg/m <sup>3</sup>                                     |                              |
| Absorption coefficient            | 0.144 mm <sup>-1</sup>                                      |                              |
| F(000)                            | 472                                                         |                              |
| Crystal size                      | 0.362 × 0.212 × 0.085 mm <sup>3</sup>                       |                              |
| Theta range for data collection   | 2.349 to 30.034°.                                           |                              |
| Index ranges                      | -12 ≤ h ≤ 12, -19 ≤ k ≤ 19, -9 ≤ l ≤ 10                     |                              |
| Reflections collected             | 10599                                                       |                              |
| Independent reflections           | 2541 [R <sub>int</sub> = 0.0357]                            |                              |
| Completeness to theta = 25.242°   | 99.2 %                                                      |                              |
| Absorption correction             | Semi-empirical from equivalents                             |                              |
| Max. and min. transmission        | 0.7460 and 0.6711                                           |                              |
| Refinement method                 | Full-matrix least-squares on F <sup>2</sup>                 |                              |
| Data / restraints / parameters    | 2541 / 3 / 151                                              |                              |
| Goodness-of-fit on F <sup>2</sup> | 1.018                                                       |                              |
| Final R indices [I > 2σ(I)]       | R <sub>1</sub> = 0.0465, wR <sub>2</sub> = 0.1060           |                              |
| R indices (all data)              | R <sub>1</sub> = 0.0827, wR <sub>2</sub> = 0.1222           |                              |
| Largest diff. peak and hole       | 0.309 and -0.231 e.Å <sup>-3</sup>                          |                              |

**Table S3.** Bond lengths [Å] and angles [°] for **2**.

|                   |            |                     |            |
|-------------------|------------|---------------------|------------|
| N(1)-C(2)         | 1.323(2)   | N(1)-H(1A)          | 0.8600     |
| N(1)-H(1B)        | 0.8600     | C(2)-N(10)          | 1.3538(19) |
| C(2)-C(3)         | 1.398(2)   | C(3)-N(4)           | 1.378(2)   |
| C(3)-C(7)         | 1.433(2)   | N(4)-O(5)           | 1.240(2)   |
| N(4)-O(6)         | 1.239(2)   | C(7)-N(9)           | 1.321(2)   |
| C(7)-N(8)         | 1.336(2)   | N(8)-H(8A)          | 0.8600     |
| N(8)-H(8B)        | 0.8600     | N(9)-N(10)          | 1.4098(17) |
| N(10)-C(11)       | 1.371(2)   | C(11)-N(12)         | 1.319(2)   |
| C(11)-N(15)       | 1.322(2)   | N(12)-N(13)         | 1.356(2)   |
| N(13)-N(14)       | 1.292(2)   | N(14)-N(15)         | 1.348(2)   |
| N(15)-H(15)       | 0.8600     | O(16)-H(16B)        | 0.814(9)   |
| O(16)-H(16A)      | 0.814(9)   |                     |            |
|                   |            |                     |            |
| C(2)-N(1)-H(1A)   | 120.0      | C(2)-N(1)-H(1B)     | 120.0      |
| H(1A)-N(1)-H(1B)  | 120.0      | N(1)-C(2)-N(10)     | 123.54(16) |
| N(1)-C(2)-C(3)    | 131.99(15) | N(10)-C(2)-C(3)     | 104.47(13) |
| N(4)-C(3)-C(2)    | 125.33(15) | N(4)-C(3)-C(7)      | 127.81(16) |
| C(2)-C(3)-C(7)    | 106.86(13) | O(5)-N(4)-O(6)      | 122.84(15) |
| O(5)-N(4)-C(3)    | 118.43(17) | O(6)-N(4)-C(3)      | 118.73(15) |
| N(9)-C(7)-N(8)    | 121.37(15) | N(9)-C(7)-C(3)      | 110.98(14) |
| N(8)-C(7)-C(3)    | 127.65(15) | C(7)-N(8)-H(8A)     | 120.0      |
| C(7)-N(8)-H(8B)   | 120.0      | H(8A)-N(8)-H(8B)    | 120.0      |
| C(7)-N(9)-N(10)   | 104.01(12) | C(2)-N(10)-C(11)    | 128.20(14) |
| C(2)-N(10)-N(9)   | 113.66(13) | C(11)-N(10)-N(9)    | 118.13(12) |
| N(12)-C(11)-N(15) | 110.53(14) | N(12)-C(11)-N(10)   | 125.34(14) |
| N(15)-C(11)-N(10) | 124.12(14) | C(11)-N(12)-N(13)   | 104.11(14) |
| N(14)-N(13)-N(12) | 111.52(14) | N(13)-N(14)-N(15)   | 106.37(13) |
| C(11)-N(15)-N(14) | 107.45(13) | C(11)-N(15)-H(15)   | 126.3      |
| N(14)-N(15)-H(15) | 126.3      | H(16B)-O(16)-H(16A) | 109.0(19)  |

**Table S4.** Torsion angles [°] for **2**.

---

|                         |             |
|-------------------------|-------------|
| N(1)-C(2)-C(3)-N(4)     | 1.7(3)      |
| N(10)-C(2)-C(3)-N(4)    | -178.94(16) |
| N(1)-C(2)-C(3)-C(7)     | -178.65(17) |
| N(10)-C(2)-C(3)-C(7)    | 0.73(18)    |
| C(2)-C(3)-N(4)-O(5)     | -2.7(3)     |
| C(7)-C(3)-N(4)-O(5)     | 177.70(17)  |
| C(2)-C(3)-N(4)-O(6)     | 177.34(16)  |
| C(7)-C(3)-N(4)-O(6)     | -2.3(3)     |
| N(4)-C(3)-C(7)-N(9)     | 179.26(15)  |
| C(2)-C(3)-C(7)-N(9)     | -0.40(19)   |
| N(4)-C(3)-C(7)-N(8)     | -0.3(3)     |
| C(2)-C(3)-C(7)-N(8)     | -179.95(16) |
| N(8)-C(7)-N(9)-N(10)    | 179.48(15)  |
| C(3)-C(7)-N(9)-N(10)    | -0.11(17)   |
| N(1)-C(2)-N(10)-C(11)   | -2.2(3)     |
| C(3)-C(2)-N(10)-C(11)   | 178.39(15)  |
| N(1)-C(2)-N(10)-N(9)    | 178.59(15)  |
| C(3)-C(2)-N(10)-N(9)    | -0.86(18)   |
| C(7)-N(9)-N(10)-C(2)    | 0.62(17)    |
| C(7)-N(9)-N(10)-C(11)   | -178.70(14) |
| C(2)-N(10)-C(11)-N(12)  | 11.4(3)     |
| N(9)-N(10)-C(11)-N(12)  | -169.36(15) |
| C(2)-N(10)-C(11)-N(15)  | -169.77(16) |
| N(9)-N(10)-C(11)-N(15)  | 9.5(2)      |
| N(15)-C(11)-N(12)-N(13) | 0.14(18)    |
| N(10)-C(11)-N(12)-N(13) | 179.09(15)  |
| C(11)-N(12)-N(13)-N(14) | -0.6(2)     |
| N(12)-N(13)-N(14)-N(15) | 0.8(2)      |
| N(12)-C(11)-N(15)-N(14) | 0.35(19)    |
| N(10)-C(11)-N(15)-N(14) | -178.62(15) |
| N(13)-N(14)-N(15)-C(11) | -0.72(19)   |

---

**Table S5.** Hydrogen bonds for **2** [ $\text{\AA}$  and  $^\circ$ ].

| D-H...A               | d(D-H)   | d(H...A)  | d(D...A)   | <(DHA) |
|-----------------------|----------|-----------|------------|--------|
| N(1)-H(1A)...N(12)    | 0.86     | 2.24      | 2.858(2)   | 128.3  |
| N(1)-H(1B)...O(5)     | 0.86     | 2.31      | 2.826(2)   | 118.9  |
| N(8)-H(8A)...O(5)#2   | 0.86     | 2.20      | 3.056(2)   | 177.5  |
| N(8)-H(8B)...O(6)     | 0.86     | 2.30      | 2.851(2)   | 121.6  |
| N(8)-H(8B)...N(13)#3  | 0.86     | 2.30      | 2.984(2)   | 136.5  |
| N(15)-H(15)...O(16)   | 0.86     | 1.81      | 2.6399(18) | 161.8  |
| O(16)-H(16B)...O(6)#2 | 0.814(9) | 2.072(13) | 2.8552(19) | 161(2) |
| O(16)-H(16A)...N(9)#4 | 0.814(9) | 2.162(12) | 2.9615(19) | 167(3) |

Symmetry transformations used to generate equivalent atoms:

#1  $-x+1, y-1/2, -z+3/2$  #2  $-x, y+1/2, -z+1/2$  #3  $x-1, y, z-1$   
 #4  $x, -y+3/2, z+1/2$

**Table S6.** Crystal data and structure refinement for **9**.

|                                         |                                                           |                             |
|-----------------------------------------|-----------------------------------------------------------|-----------------------------|
| Identification code                     | <b>9</b>                                                  |                             |
| CCDC number                             | 1936195                                                   |                             |
| Empirical formula                       | $\text{C}_4\text{H}_{12}\text{ClN}_7\text{O}_4$           |                             |
| Formula weight                          | 257.66                                                    |                             |
| Temperature                             | 296(2) K                                                  |                             |
| Wavelength                              | 0.71073 $\text{\AA}$                                      |                             |
| Crystal system                          | Monoclinic                                                |                             |
| Space group                             | $P2_1/c$                                                  |                             |
| Unit cell dimensions                    | $a = 8.5265(6) \text{\AA}$                                | $\alpha = 90^\circ$ .       |
|                                         | $b = 6.9696(5) \text{\AA}$                                | $\beta = 96.241(2)^\circ$ . |
|                                         | $c = 18.0794(13) \text{\AA}$                              | $\gamma = 90^\circ$ .       |
| Volume                                  | 1068.02(13) $\text{\AA}^3$                                |                             |
| Z                                       | 4                                                         |                             |
| Density (20°C)                          | 1.602 $\text{Mg/m}^3$                                     |                             |
| Absorption coefficient                  | 0.374 $\text{mm}^{-1}$                                    |                             |
| F(000)                                  | 536                                                       |                             |
| Crystal size                            | 0.226 $\times$ 0.036 $\times$ 0.036 $\text{mm}^3$         |                             |
| Theta range for data collection         | 2.266 to 30.073 $^\circ$ .                                |                             |
| Index ranges                            | $-9 \leq h \leq 11, -9 \leq k \leq 9, -24 \leq l \leq 24$ |                             |
| Reflections collected                   | 11746                                                     |                             |
| Independent reflections                 | 3034 [ $R_{\text{int}} = 0.0531$ ]                        |                             |
| Completeness to theta = 25.242 $^\circ$ | 100.0 %                                                   |                             |
| Absorption correction                   | Semi-empirical from equivalents                           |                             |
| Max. and min. transmission              | 0.7460 and 0.6917                                         |                             |
| Refinement method                       | Full-matrix least-squares on $F^2$                        |                             |
| Data / restraints / parameters          | 3034 / 6 / 161                                            |                             |
| Goodness-of-fit on $F^2$                | 0.993                                                     |                             |
| Final R indices [ $I > 2\sigma(I)$ ]    | $R_1 = 0.0438, wR_2 = 0.0958$                             |                             |
| R indices (all data)                    | $R_1 = 0.0986, wR_2 = 0.1136$                             |                             |
| Largest diff. peak and hole             | 0.309 and -0.407 $\text{e.\AA}^{-3}$                      |                             |



**Table S7.** Bond lengths [Å] and angles [°] for **9**.

|                     |            |                     |            |
|---------------------|------------|---------------------|------------|
| O(1)-N(3)           | 1.245(2)   | O(2)-N(3)           | 1.245(2)   |
| N(3)-C(4)           | 1.384(2)   | C(4)-C(5)           | 1.399(3)   |
| C(4)-C(12)          | 1.429(3)   | C(5)-N(6)           | 1.318(2)   |
| C(5)-N(7)           | 1.384(2)   | N(6)-H(6A)          | 0.8600     |
| N(6)-H(6B)          | 0.8600     | N(7)-C(8)           | 1.383(2)   |
| N(7)-N(11)          | 1.414(2)   | C(8)-N(10)          | 1.298(3)   |
| C(8)-N(9)           | 1.314(3)   | N(9)-H(9A)          | 0.8600     |
| N(9)-H(9B)          | 0.8600     | N(10)-H(10A)        | 0.8600     |
| N(10)-H(10B)        | 0.8600     | N(11)-C(12)         | 1.316(2)   |
| C(12)-N(13)         | 1.338(3)   | N(13)-H(13A)        | 0.8600     |
| N(13)-H(13B)        | 0.8600     | O(15)-H(15A)        | 0.824(9)   |
| O(15)-H(15B)        | 0.830(10)  | O(16)-H(16A)        | 0.822(10)  |
| O(16)-H(16B)        | 0.823(10)  |                     |            |
| O(2)-N(3)-O(1)      | 121.94(16) | O(2)-N(3)-C(4)      | 118.68(17) |
| O(1)-N(3)-C(4)      | 119.38(16) | N(3)-C(4)-C(5)      | 124.94(17) |
| N(3)-C(4)-C(12)     | 126.89(17) | C(5)-C(4)-C(12)     | 108.16(16) |
| N(6)-C(5)-N(7)      | 126.91(17) | N(6)-C(5)-C(4)      | 129.81(17) |
| N(7)-C(5)-C(4)      | 103.25(16) | C(5)-N(6)-H(6A)     | 120.0      |
| C(5)-N(6)-H(6B)     | 120.0      | H(6A)-N(6)-H(6B)    | 120.0      |
| C(8)-N(7)-C(5)      | 129.78(17) | C(8)-N(7)-N(11)     | 116.84(16) |
| C(5)-N(7)-N(11)     | 113.11(15) | N(10)-C(8)-N(9)     | 123.77(18) |
| N(10)-C(8)-N(7)     | 117.43(19) | N(9)-C(8)-N(7)      | 118.80(18) |
| C(8)-N(9)-H(9A)     | 120.0      | C(8)-N(9)-H(9B)     | 120.0      |
| H(9A)-N(9)-H(9B)    | 120.0      | C(8)-N(10)-H(10A)   | 120.0      |
| C(8)-N(10)-H(10B)   | 120.0      | H(10A)-N(10)-H(10B) | 120.0      |
| C(12)-N(11)-N(7)    | 104.69(15) | N(11)-C(12)-N(13)   | 122.19(18) |
| N(11)-C(12)-C(4)    | 110.76(17) | N(13)-C(12)-C(4)    | 127.05(17) |
| C(12)-N(13)-H(13A)  | 120.0      | C(12)-N(13)-H(13B)  | 120.0      |
| H(13A)-N(13)-H(13B) | 120.0      | H(15A)-O(15)-H(15B) | 102.1(19)  |
| H(16A)-O(16)-H(16B) | 103(2)     |                     |            |

**Table S8.** Torsion angles [°] for **9**.

---

|                        |             |
|------------------------|-------------|
| O(2)-N(3)-C(4)-C(5)    | 178.26(19)  |
| O(1)-N(3)-C(4)-C(5)    | -2.3(3)     |
| O(2)-N(3)-C(4)-C(12)   | -0.7(3)     |
| O(1)-N(3)-C(4)-C(12)   | 178.79(19)  |
| N(3)-C(4)-C(5)-N(6)    | -2.3(3)     |
| C(12)-C(4)-C(5)-N(6)   | 176.85(19)  |
| N(3)-C(4)-C(5)-N(7)    | 179.76(18)  |
| C(12)-C(4)-C(5)-N(7)   | -1.1(2)     |
| N(6)-C(5)-N(7)-C(8)    | -2.7(3)     |
| C(4)-C(5)-N(7)-C(8)    | 175.38(19)  |
| N(6)-C(5)-N(7)-N(11)   | -176.53(18) |
| C(4)-C(5)-N(7)-N(11)   | 1.5(2)      |
| C(5)-N(7)-C(8)-N(10)   | -152.5(2)   |
| N(11)-N(7)-C(8)-N(10)  | 21.1(3)     |
| C(5)-N(7)-C(8)-N(9)    | 27.8(3)     |
| N(11)-N(7)-C(8)-N(9)   | -158.58(19) |
| C(8)-N(7)-N(11)-C(12)  | -176.03(17) |
| C(5)-N(7)-N(11)-C(12)  | -1.3(2)     |
| N(7)-N(11)-C(12)-N(13) | -179.14(18) |
| N(7)-N(11)-C(12)-C(4)  | 0.5(2)      |
| N(3)-C(4)-C(12)-N(11)  | 179.49(19)  |
| C(5)-C(4)-C(12)-N(11)  | 0.4(2)      |
| N(3)-C(4)-C(12)-N(13)  | -0.9(3)     |
| C(5)-C(4)-C(12)-N(13)  | -180.0(2)   |

---

**Table S9.** Hydrogen bonds for **9** [Å and °].

| D-H...A                 | d(D-H)    | d(H...A)  | d(D...A) | <(DHA) |
|-------------------------|-----------|-----------|----------|--------|
| N(6)-H(6A)...O(15)#1    | 0.86      | 2.10      | 2.846(2) | 144.6  |
| N(6)-H(6B)...O(1)       | 0.86      | 2.25      | 2.791(2) | 121.4  |
| N(6)-H(6B)...O(15)#2    | 0.86      | 2.26      | 3.055(2) | 154.2  |
| N(10)-H(10B)...O(16)    | 0.86      | 2.03      | 2.876(3) | 167.3  |
| N(13)-H(13B)...O(2)     | 0.86      | 2.25      | 2.808(2) | 122.7  |
| O(15)-H(15A)...O(16)    | 0.824(9)  | 2.027(10) | 2.850(3) | 175(3) |
| O(15)-H(15B)...Cl(14)#6 | 0.830(10) | 2.388(10) | 3.217(2) | 177(3) |

Symmetry transformations used to generate equivalent atoms:

#1  $x-1, y, z$  #2  $-x+1, -y+1, -z+1$  #3  $-x+1, y-1/2, -z+1/2$

#4  $x, -y+3/2, z-1/2$  #5  $-x+2, -y+2, -z+1$  #6  $x, y-1, z$

#7  $-x+2, y-1/2, -z+1/2$

**Table S10.** Crystal data and structure refinement for **13**.

|                                   |                                                               |                              |
|-----------------------------------|---------------------------------------------------------------|------------------------------|
| Identification code               | <b>13</b>                                                     |                              |
| CCDC number                       | 1936194                                                       |                              |
| Empirical formula                 | C <sub>5</sub> H <sub>9</sub> ClN <sub>8</sub> O <sub>3</sub> |                              |
| Formula weight                    | 264.65                                                        |                              |
| Temperature                       | 296(2) K                                                      |                              |
| Wavelength                        | 0.71073 Å                                                     |                              |
| Crystal system                    | Triclinic                                                     |                              |
| Space group                       | P-1                                                           |                              |
| Unit cell dimensions              | $a = 7.8649(6)$ Å                                             | $\alpha = 87.756(2)^\circ$ . |
|                                   | $b = 7.8722(6)$ Å                                             | $\beta = 74.218(2)^\circ$ .  |
|                                   | $c = 8.8770(6)$ Å                                             | $\gamma = 73.265(2)^\circ$ . |
| Volume                            | 506.04(6) Å <sup>3</sup>                                      |                              |
| Z                                 | 2                                                             |                              |
| Density (20°C)                    | 1.737 Mg/m <sup>3</sup>                                       |                              |
| Absorption coefficient            | 0.393 mm <sup>-1</sup>                                        |                              |
| F(000)                            | 272                                                           |                              |
| Crystal size                      | 0.408 × 0.223 × 0.060 mm <sup>3</sup>                         |                              |
| Theta range for data collection   | 2.386 to 30.019°.                                             |                              |
| Index ranges                      | -11 ≤ h ≤ 11, -11 ≤ k ≤ 10, -12 ≤ l ≤ 11                      |                              |
| Reflections collected             | 6095                                                          |                              |
| Independent reflections           | 2773 [R <sub>int</sub> = 0.0200]                              |                              |
| Completeness to theta = 25.242°   | 99.1 %                                                        |                              |
| Absorption correction             | Semi-empirical from equivalents                               |                              |
| Max. and min. transmission        | 0.7460 and 0.6981                                             |                              |
| Refinement method                 | Full-matrix least-squares on F <sup>2</sup>                   |                              |
| Data / restraints / parameters    | 2773 / 3 / 160                                                |                              |
| Goodness-of-fit on F <sup>2</sup> | 1.029                                                         |                              |
| Final R indices [I > 2σ(I)]       | R <sub>1</sub> = 0.0395, wR <sub>2</sub> = 0.0981             |                              |
| R indices (all data)              | R <sub>1</sub> = 0.0552, wR <sub>2</sub> = 0.1063             |                              |
| Largest diff. peak and hole       | 0.336 and -0.285 e.Å <sup>-3</sup>                            |                              |

**Table S11.** Bond lengths [Å] and angles [°] for **13**.

|                     |            |                     |            |
|---------------------|------------|---------------------|------------|
| O(1)-N(3)           | 1.2377(19) | O(2)-N(3)           | 1.2339(18) |
| N(3)-C(4)           | 1.398(2)   | C(4)-C(15)          | 1.378(2)   |
| C(4)-C(5)           | 1.438(2)   | C(5)-N(7)           | 1.332(2)   |
| C(5)-N(6)           | 1.338(2)   | N(6)-H(6A)          | 0.8600     |
| N(6)-H(6B)          | 0.8600     | N(7)-N(8)           | 1.3947(19) |
| N(8)-C(15)          | 1.352(2)   | N(8)-C(9)           | 1.376(2)   |
| C(9)-N(10)          | 1.305(2)   | C(9)-N(11)          | 1.330(2)   |
| N(10)-H(10B)        | 0.8600     | N(11)-C(12)         | 1.338(2)   |
| C(12)-N(13)         | 1.308(2)   | C(12)-N(14)         | 1.370(2)   |
| N(13)-H(13A)        | 0.8600     | N(13)-H(13B)        | 0.8600     |
| N(14)-C(15)         | 1.343(2)   | N(14)-H(14)         | 0.8600     |
| O(17)-H(17A)        | 0.822(10)  | O(17)-H(17B)        | 0.817(10)  |
| O(2)-N(3)-O(1)      | 123.11(14) | O(2)-N(3)-C(4)      | 118.61(14) |
| O(1)-N(3)-C(4)      | 118.28(14) | C(15)-C(4)-N(3)     | 124.98(15) |
| C(15)-C(4)-C(5)     | 105.95(14) | N(3)-C(4)-C(5)      | 128.74(15) |
| N(7)-C(5)-N(6)      | 122.20(16) | N(7)-C(5)-C(4)      | 110.99(14) |
| N(6)-C(5)-C(4)      | 126.77(15) | C(5)-N(6)-H(6A)     | 120.0      |
| C(5)-N(6)-H(6B)     | 120.0      | H(6A)-N(6)-H(6B)    | 120.0      |
| C(5)-N(7)-N(8)      | 103.76(13) | C(15)-N(8)-C(9)     | 121.67(14) |
| C(15)-N(8)-N(7)     | 113.36(13) | C(9)-N(8)-N(7)      | 124.78(13) |
| N(10)-C(9)-N(11)    | 123.16(15) | N(10)-C(9)-N(8)     | 117.72(15) |
| N(11)-C(9)-N(8)     | 119.12(14) | C(9)-N(10)-H(10A)   | 120.0      |
| C(9)-N(10)-H(10B)   | 120.0      | H(10A)-N(10)-H(10B) | 120.0      |
| C(9)-N(11)-C(12)    | 119.36(14) | N(13)-C(12)-N(11)   | 120.46(15) |
| N(13)-C(12)-N(14)   | 117.47(15) | N(11)-C(12)-N(14)   | 122.06(15) |
| C(12)-N(13)-H(13A)  | 120.0      | C(12)-N(13)-H(13B)  | 120.0      |
| H(13A)-N(13)-H(13B) | 120.0      | C(15)-N(14)-C(12)   | 119.07(14) |
| C(15)-N(14)-H(14)   | 120.5      | C(12)-N(14)-H(14)   | 120.5      |
| N(14)-C(15)-N(8)    | 118.52(14) | N(14)-C(15)-C(4)    | 135.54(15) |
| N(8)-C(15)-C(4)     | 105.92(14) | H(17A)-O(17)-H(17B) | 105(2)     |

**Table S12.** Torsion angles [°] for **13**.

---

|                         |             |
|-------------------------|-------------|
| O(2)-N(3)-C(4)-C(15)    | -172.53(16) |
| O(1)-N(3)-C(4)-C(15)    | 7.2(2)      |
| O(2)-N(3)-C(4)-C(5)     | -0.1(3)     |
| O(1)-N(3)-C(4)-C(5)     | 179.63(16)  |
| C(15)-C(4)-C(5)-N(7)    | 0.39(19)    |
| N(3)-C(4)-C(5)-N(7)     | -173.15(16) |
| C(15)-C(4)-C(5)-N(6)    | 178.21(17)  |
| N(3)-C(4)-C(5)-N(6)     | 4.7(3)      |
| N(6)-C(5)-N(7)-N(8)     | -177.83(16) |
| C(4)-C(5)-N(7)-N(8)     | 0.10(18)    |
| C(5)-N(7)-N(8)-C(15)    | -0.60(18)   |
| C(5)-N(7)-N(8)-C(9)     | 174.44(15)  |
| C(15)-N(8)-C(9)-N(10)   | 178.83(15)  |
| N(7)-N(8)-C(9)-N(10)    | 4.2(2)      |
| C(15)-N(8)-C(9)-N(11)   | -1.5(2)     |
| N(7)-N(8)-C(9)-N(11)    | -176.16(14) |
| N(10)-C(9)-N(11)-C(12)  | 177.79(16)  |
| N(8)-C(9)-N(11)-C(12)   | -1.8(2)     |
| C(9)-N(11)-C(12)-N(13)  | -178.29(17) |
| C(9)-N(11)-C(12)-N(14)  | 1.9(3)      |
| N(13)-C(12)-N(14)-C(15) | -178.41(17) |
| N(11)-C(12)-N(14)-C(15) | 1.4(3)      |
| C(12)-N(14)-C(15)-N(8)  | -4.6(2)     |
| C(12)-N(14)-C(15)-C(4)  | 174.20(18)  |
| C(9)-N(8)-C(15)-N(14)   | 4.8(2)      |
| N(7)-N(8)-C(15)-N(14)   | 179.98(14)  |
| C(9)-N(8)-C(15)-C(4)    | -174.36(15) |
| N(7)-N(8)-C(15)-C(4)    | 0.85(18)    |
| N(3)-C(4)-C(15)-N(14)   | -5.8(3)     |
| C(5)-C(4)-C(15)-N(14)   | -179.62(18) |
| N(3)-C(4)-C(15)-N(8)    | 173.13(15)  |
| C(5)-C(4)-C(15)-N(8)    | -0.72(18)   |

---

**Table S13.** Hydrogen bonds for **13** [Å and °].

| D-H...A                 | d(D-H)    | d(H...A)  | d(D...A)   | <(DHA) |
|-------------------------|-----------|-----------|------------|--------|
| N(6)-H(6A)...Cl(16)#1   | 0.86      | 2.44      | 3.2856(17) | 166.0  |
| N(6)-H(6B)...O(2)       | 0.86      | 2.34      | 2.884(2)   | 121.7  |
| N(10)-H(10B)...O(17)    | 0.86      | 2.03      | 2.865(2)   | 164.0  |
| N(13)-H(13A)...N(11)#5  | 0.86      | 2.13      | 2.987(2)   | 179.3  |
| O(17)-H(17A)...Cl(16)#4 | 0.822(10) | 2.386(10) | 3.2072(15) | 178(3) |

Symmetry transformations used to generate equivalent atoms:

#1 x,y,z+1 #2 -x+1,-y+1,-z+1 #3 x-1,y+1,z  
#4 -x,-y+2,-z+1 #5 -x+1,-y+2,-z #6 -x+2,-y+1,-z  
#7 x+1,y,z #8 -x+1,-y+1,-z

### References:

- [1] M. S. Westwell, M. S. Searle, D. J. Wales, D. H. Williams, *J. Am. Chem. Soc.* 1995, **117**, 5013-5015.
- [2] H. Gao, C. Ye, C. M. Piekarski, J. M. Shreeve, *J. Phys. Chem. C* 2007, **111**, 10718-10731.
- [3] H. D. B. Jenkins, D. Tudela and L. Glasser, *Inorg. Chem.* 2002, **41**, 2364-2367.
- [4] P. J. Linstrom, W. G. Mallard, Eds., NIST Chemistry WebBook, NIST Standard Reference Database Number 69, June 2005, National Institute of Standards and Technology, Gaithersburg MD, 20899 (<http://webbook.nist.gov>).
